# Supplementary figures and images for: Solvent-dependent regioselectivity of 2′-deoxyadenosine alkylation by 9-aminomethyl derivatives of SN38
Source: Royal Society of Chemistry journal article supplement (doi:10.1039/c9nj04828f), 2019-01-01

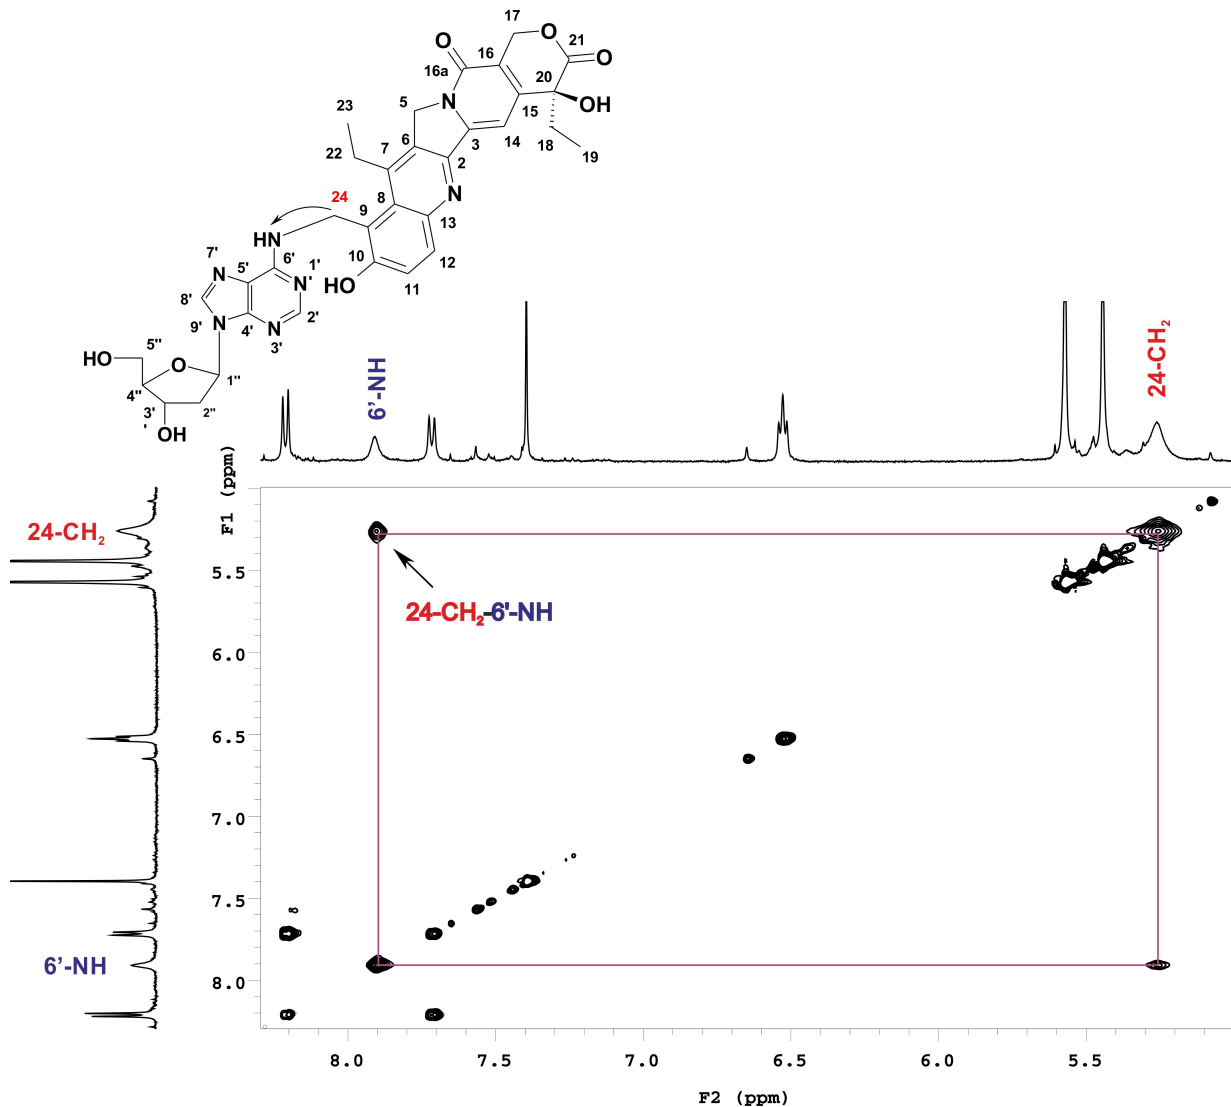

Supplement: c9nj04828f10.pdf [file c9nj04828f10.pdf]

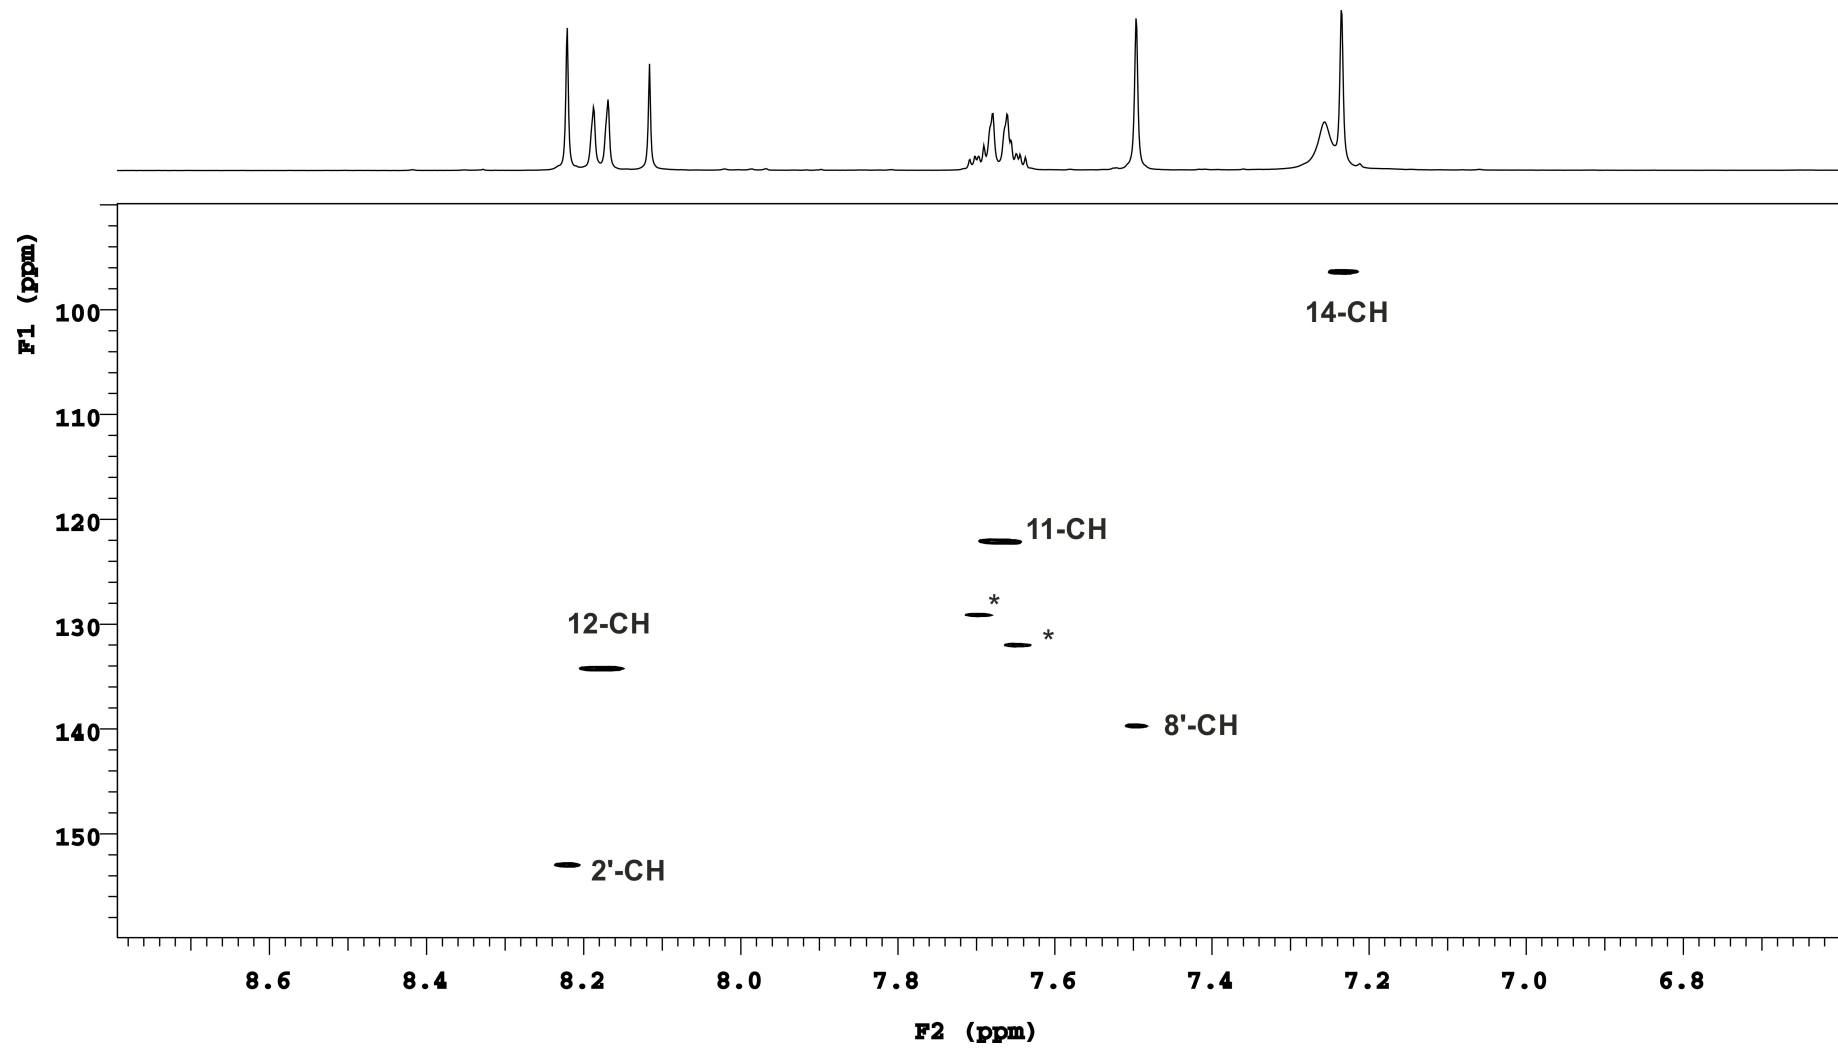

Supplement: c9nj04828f3.pdf [file c9nj04828f3.pdf]

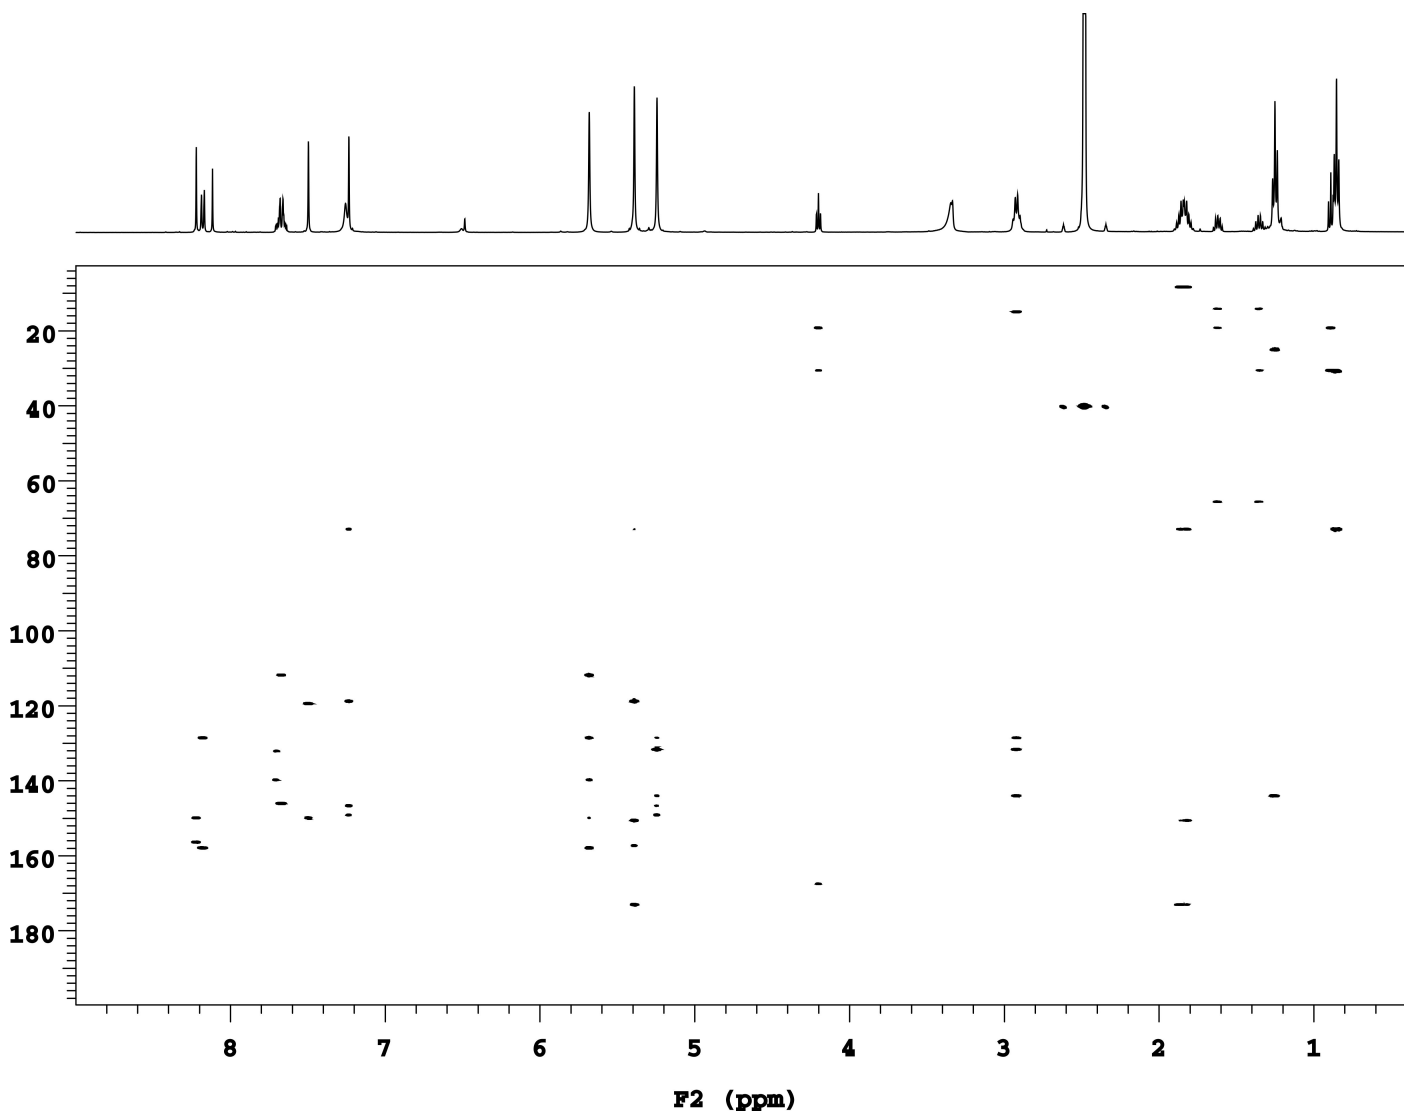

Supplement: c9nj04828f7.pdf [file c9nj04828f7.pdf]

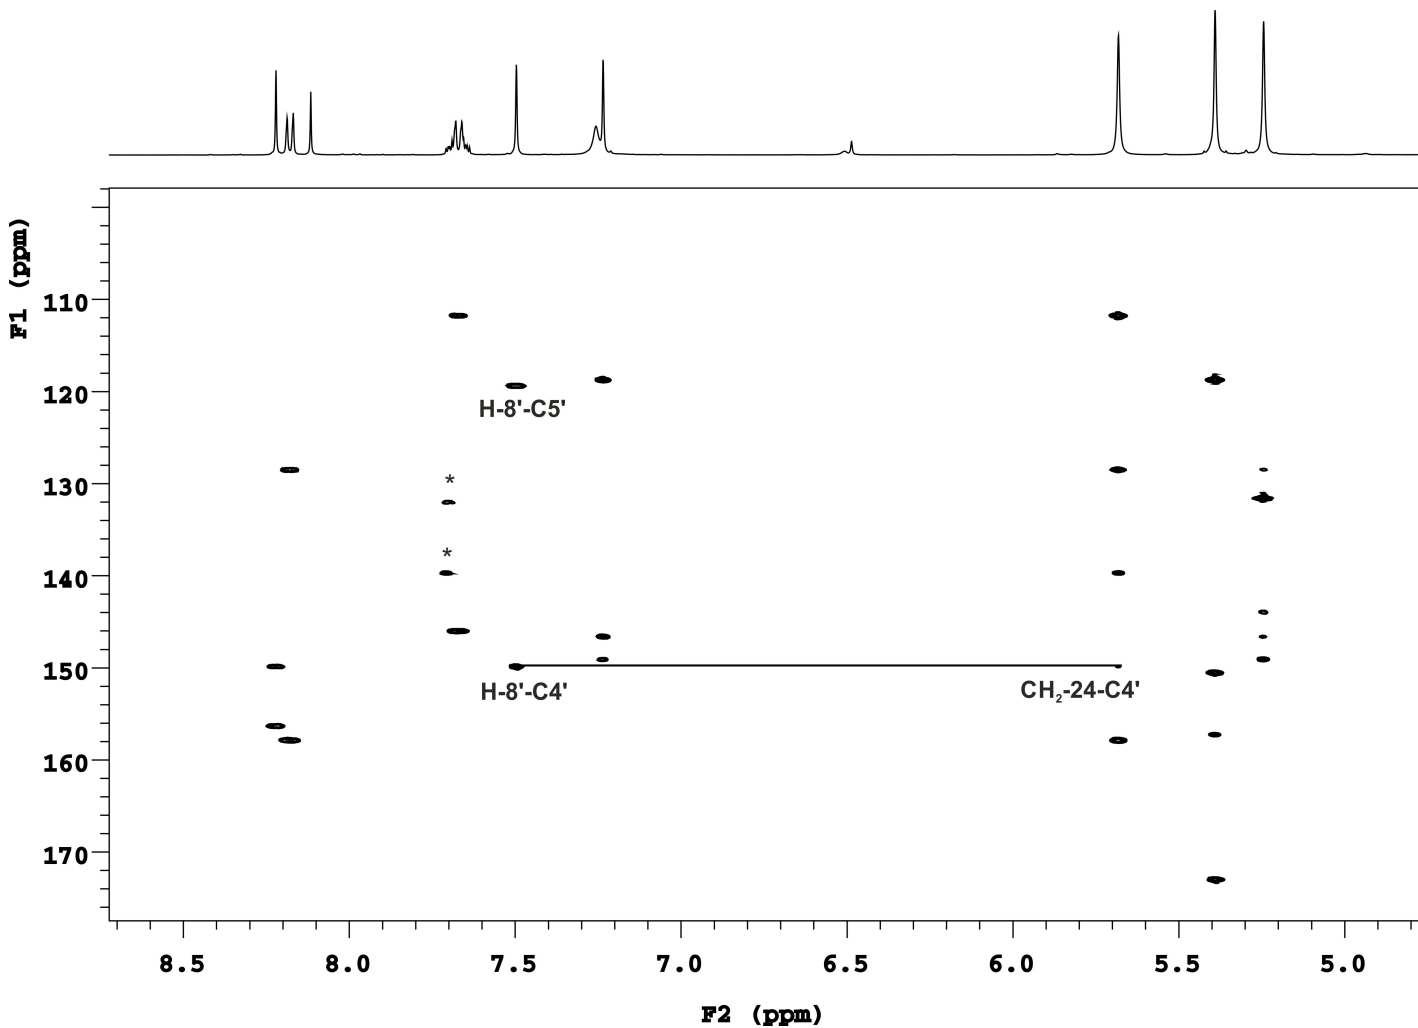

Supplement: c9nj04828f8.pdf [file c9nj04828f8.pdf]
